# Supplementary material for: Solution conformations of early intermediates in Mos1 transposition
Source: PubMed Central journal article supplement — Nucleic Acids Res. 2012 Dec 21;41(3):2020–33. doi: 10.1093/nar/gks1295 (PMC3561948; doi:10.1093/nar/gks1295), 2012-12-21
Supplement: supp_gks1295_nar-01437-d-2012-File009.pdf [file supp_gks1295_nar-01437-d-2012-File009.pdf]

## SUPPLEMENTARY DATA

**Supplementary Table 1. Scattering conditions of the SEC2 complexes and contrasts used in the MONSA calculation.** The contrast values were obtained from the ATSAS on line server at [www.embl-hamburg.de/biosaxs/atsas-online/](http://www.embl-hamburg.de/biosaxs/atsas-online/).

| Sample | % D <sub>2</sub> O in buffer | % deuteration of protein | Contrast (10 <sup>10</sup> cm <sup>-2</sup> ) |       |
|--------|------------------------------|--------------------------|-----------------------------------------------|-------|
|        |                              |                          | Protein                                       | DNA   |
| SAXS   |                              |                          |                                               |       |
| H-SEC2 | 0                            | 0                        | 1.00                                          | 2.00  |
| SANS   |                              |                          |                                               |       |
| H-SEC2 | 0                            | 0                        | 2.50                                          | 4.50  |
| H-SEC2 | 100                          | 0                        | -3.00                                         | -1.5  |
| D-SEC2 | 65                           | 72.5                     | 1.83                                          | 0.60  |
| D-SEC2 | 100                          | 72.5                     | -0.1                                          | -1.50 |

The fraction (x) of the total scattering of H-SEC2 contributed by Mos1 is given by:

$$x = \frac{Vf_{\text{Mos1}} \times \text{Constrast}_{\text{Mos1}}}{(Vf_{\text{Mos1}} \times \text{Constrast}_{\text{Mos1}}) + (Vf_{\text{DNA}} \times \text{Constrast}_{\text{DNA}})}$$

The excluded volumes of the Mos1 dimer and the DNA duplex are 99.2 nm<sup>3</sup> and 25.9 nm<sup>3</sup> respectively. Thus, the fraction of the total volume of H-SEC2 contributed by the Mos1 dimer ( $Vf_{\text{mos1}}$ ) is ~0.8 and the fractional volume of the DNA duplex ( $Vf_{\text{DNA}}$ ) is ~0.2.

Therefore, for H-SEC2 in 100% H<sub>2</sub>O,

$$x = \frac{(0.8 \times 2.5)}{(0.8 \times 2.5) + (0.2 \times 4.5)}$$

$$x = 0.69$$

**Supplementary Table 2. Predicted extinction coefficients at 260 nm and 280 nm for the DNA duplex, Mos1 transposase and transposase-DNA complexes.**

|                            | Extinction coefficient at 260 nm ( $M^{-1}cm^{-1}$ ) | Extinction coefficient at 280 nm ( $M^{-1}cm^{-1}$ ) | Ratio of extinction coefficients (260/280) |
|----------------------------|------------------------------------------------------|------------------------------------------------------|--------------------------------------------|
| 50 mer DNA duplex          | 777,531*                                             | 428,431 *                                            | 1.81                                       |
| Mos1 transposase (monomer) | 40,521                                               | 72,880 ‡                                             | 0.56                                       |
| SEC1                       | 818,052                                              | 501,311                                              | 1.63                                       |
| SEC2                       | 858,573                                              | 574,191                                              | 1.49                                       |
| PEC                        | 1,636,104                                            | 1,002,622                                            | 1.63                                       |

\*Obtained from IDT biophysics (<http://biophysics.idtdna.com/UVSpectrum.html>)

‡ From protparam (<http://web.expasy.org/protparam/>)

**Supplementary Figure 1. The contrast match point of D-Mos1 Transposase.** Plot of the scattering amplitude at zero angle against the percentage of D<sub>2</sub>O in the buffer. The scattering amplitude at zero angle is defined as  $\sqrt{I(0)/tcl}$  - where  $I(0)$  is intensity at zero angle;  $t$  is transmission of sample;  $c$  is concentration (mg/ml) and  $l$  is the path length (mm). The linear fit to the data points (dashed line) intercepts the x-axis at 92 % D<sub>2</sub>O, the contrast match point of D-Mos1.

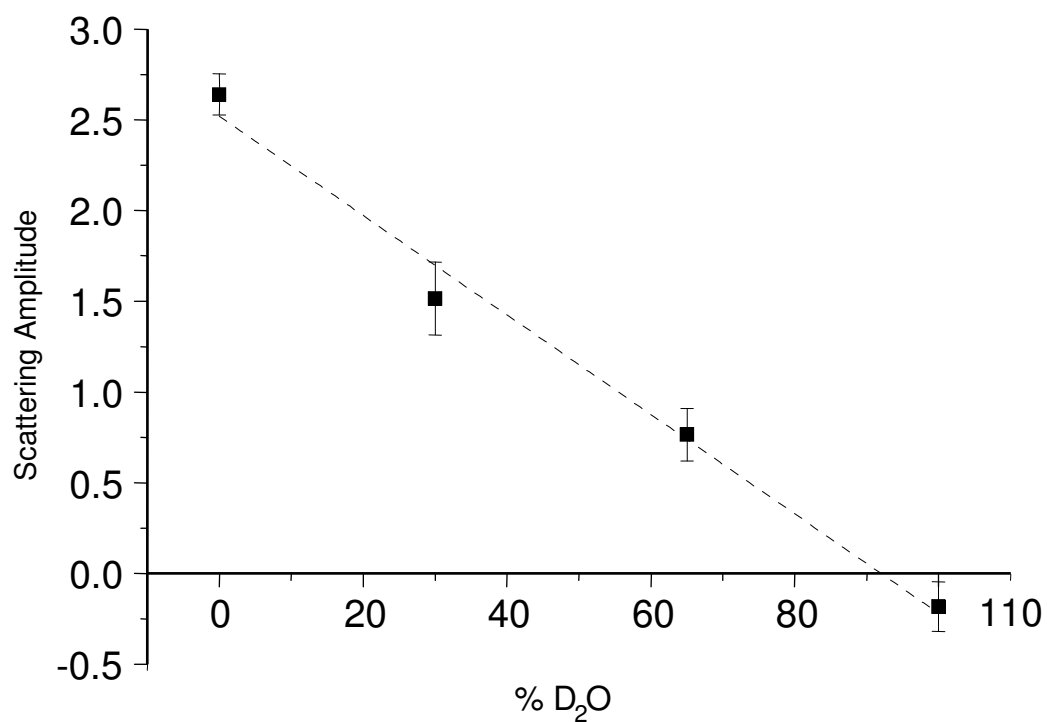

**Supplementary Figure 2. Comparison of the experimental SAXS data and calculated scattering curves for models of Mos1 homodimers.** The experimental SAXS data is shown as a black line and for each model the calculated scattering curve is shown as a red line. Fits of (A) the transposase dimer from the PEC crystal structure (Figure 3B), (B) Mos1 homodimer with the catalytic domains at the dimerisation interface (Figure 3C), (C) N-terminal Mos1 dimer model (Figure 3D) or, (D) The head-to-tail (or N-C) dimer model (Figure 3E).

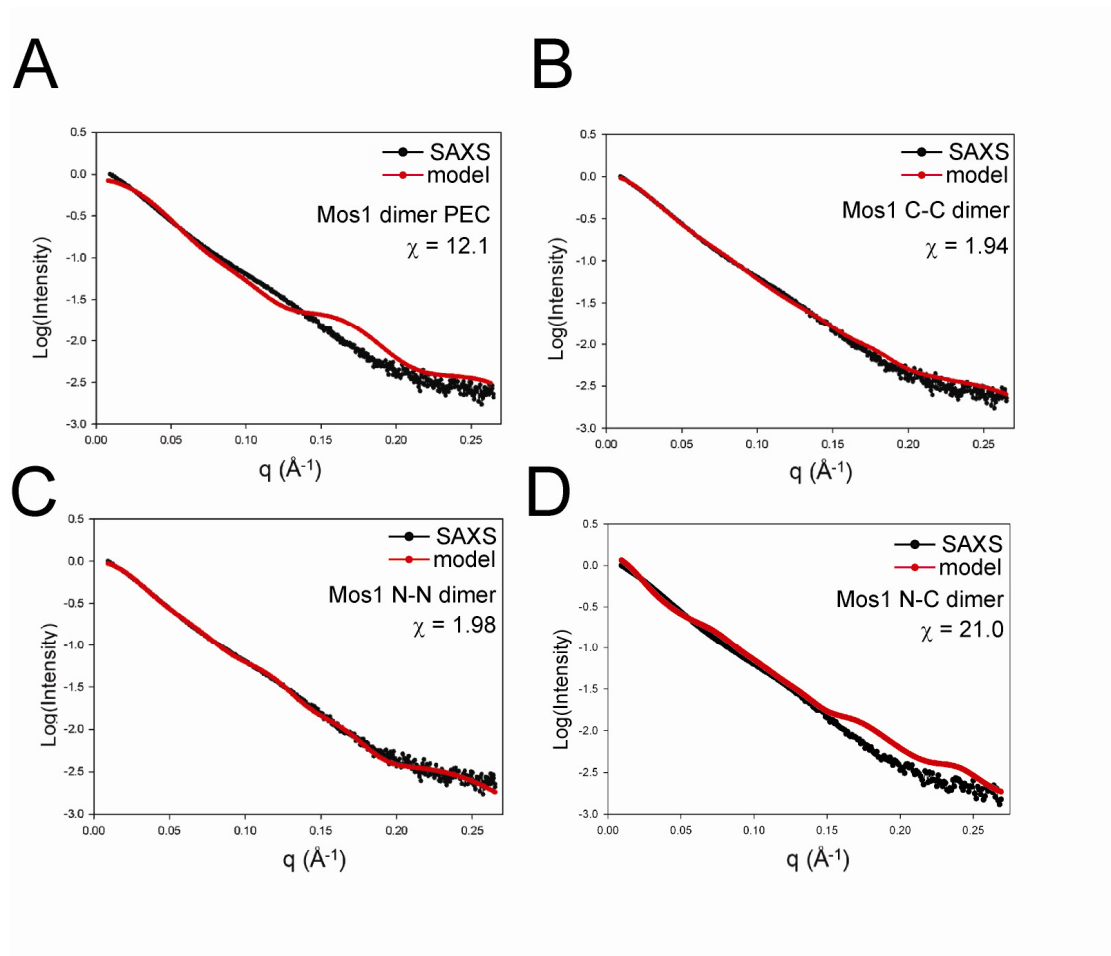

**Supplementary Figure 3.** Gallery of ten spherical bead models of the H-Mos1 dimer calculated from the SAXS data in GASBOR, with P2 symmetry imposed. The  $\chi$  of the fit to the experimental SAXS data and the NSD between models is indicated below each model.

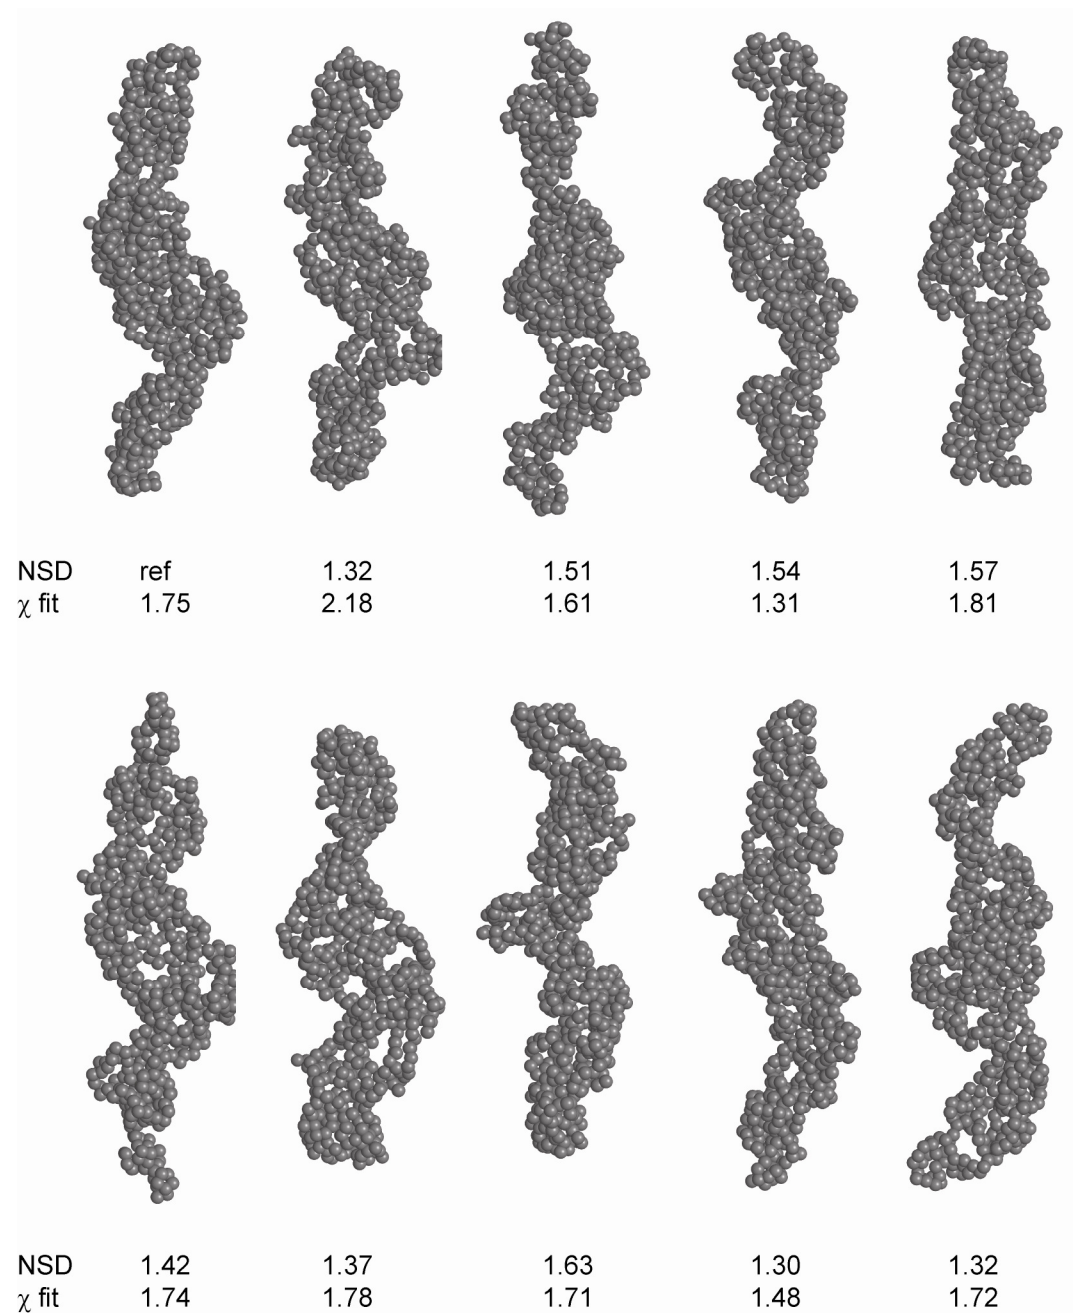

**Supplementary Figure 4.** (A) Gel filtration of N130 Mos1 with peak fractions labelled 1 to 8. (B) SDS-PAGE of the gel filtration fractions (labelled), starting sample (input) and molecular weight markers. Fractions 1 to 4 (500  $\mu$ L each) were precipitated with TCA and resuspended in 40  $\mu$ L before loading. The gel was visualised with silver stain for maximum sensitivity. A faint band at  $\sim$ 15 kDa is visible in lane 3 confirming that the minor peak contains a tetramer of N130 Mos1.

**A**

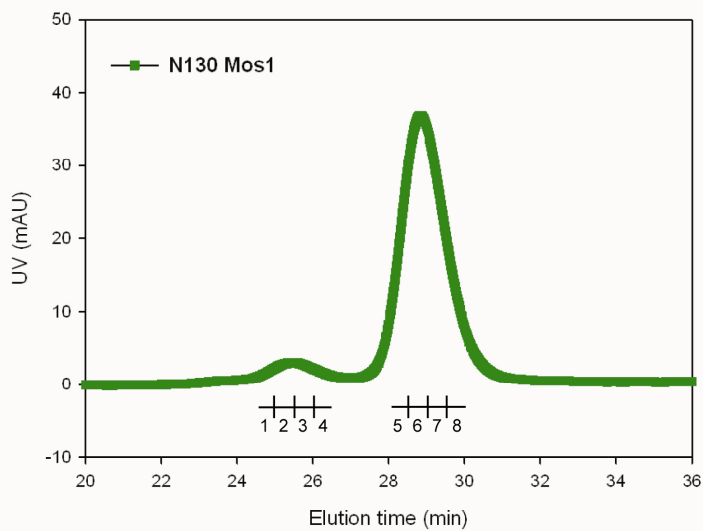

**B**

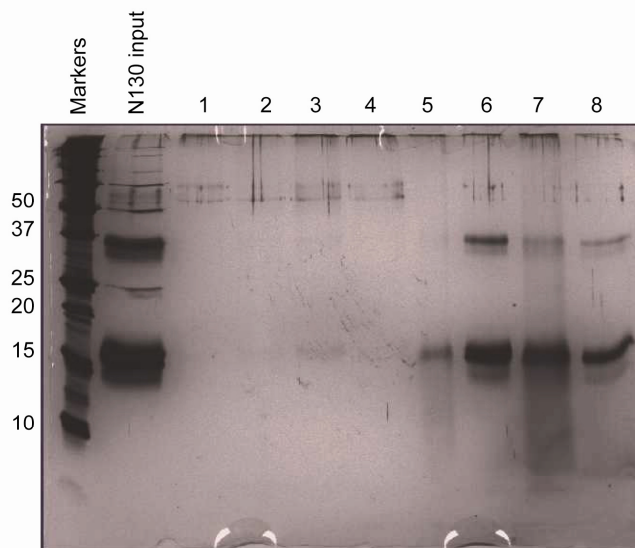

Fractions 1-4 TCA precipitated
